# Supplementary material for: EASIX for Prediction of Outcome in Hospitalized SARS-CoV-2 Infected Patients
Source: PubMed Central journal article supplement (PMC8261154; doi:10.3389/fimmu.2021.634416), 2021-06-23

**Table S1. Patient characteristics according to EASIX**

|                                                                 | Training cohort<br>n=100 |                  |          | Validation cohort<br>n=126 |                  |          |
|-----------------------------------------------------------------|--------------------------|------------------|----------|----------------------------|------------------|----------|
|                                                                 | EASIX ≥2<br>n=40         | EASIX <2<br>n=60 | <i>P</i> | EASIX ≥2<br>n=45           | EASIX <2<br>n=81 | <i>P</i> |
| <b>Median age (range, years)</b>                                | 69 (31-85)               | 61 (23-90)       | 0.007    | 68 (20-85)                 | 50 (16-87)       | <0.001   |
| <b>Age, n (%)</b>                                               |                          |                  | 0.036    |                            |                  | <0.001   |
| <60 years                                                       | 10 (25)                  | 28 (47)          |          | 12 (27)                    | 62 (77)          |          |
| ≥60 years                                                       | 30 (75)                  | 32 (53)          |          | 33 (73)                    | 19 (23)          |          |
| <b>Gender, n (%)</b>                                            |                          |                  | 0.002    |                            |                  | 0.001    |
| Male                                                            | 32 (80)                  | 29 (48)          |          | 37 (82)                    | 42 (52)          |          |
| Female                                                          | 8 (20)                   | 31 (52)          |          | 8 (18)                     | 39 (48)          |          |
| <b>Comorbidities, n (%)</b>                                     |                          |                  |          |                            |                  |          |
| CVD (including arterial hypertension)                           | 21 (53)                  | 19 (32)          |          | 29 (64)                    | 20 (24)          |          |
| Diabetes                                                        | 3 (8)                    | 5 (8)            |          | 7 (16)                     | 8 (10)           |          |
| Chronic kidney disease                                          | 3 (8)                    | 5 (8)            |          | 8 (18)                     | 3 (12)           |          |
| Chronic lung disease                                            | 6 (15)                   | 5 (8)            |          | 7 (16)                     | 10 (12)          |          |
| Malignancy                                                      | 5 (13)                   | 4 (7)            |          | 6 (13)                     | 3 (4)            |          |
| None                                                            | 15 (38)                  | 30 (50)          |          | 12 (27)                    | 55 (68)          |          |
| <b>Comorbidities, n (%)</b>                                     |                          |                  | 0.224    |                            |                  | <0.001   |
| Any                                                             | 25 (63)                  | 30 (50)          |          | 33 (73)                    | 26 (32)          |          |
| None                                                            | 15 (37)                  | 30 (50)          |          | 12 (27)                    | 55 (68)          |          |
| <b>Median LDH [U/L] (range)</b>                                 | 514 (213-1843)           | 333 (123-772)    | <0.001   | 478 (165-1112)             | 237 (109-873)    | <0.001   |
| <b>Median creatinine [mg/dL] (range)</b>                        | 1.03 (0.54-6.20)         | 0.78 (0.46-1.57) | <0.001   | 1.04 (0.58-8.80)           | 0.86 (0.60-1.90) | <0.001   |
| <b>Median thrombocytes [10<sup>9</sup> cells per L] (range)</b> | 196 (96-444)             | 242 (103-691)    | 0.002    | 154 (28-422)               | 216 (124-873)    | <0.001   |
| <b>Median EASIX (range)</b>                                     | 2.64 (2.04-19.09)        | 1.15 (0.32-1.97) | <0.001   | 3.26 (2.03-14.02)          | 0.94 (0.33-1.99) | <0.001   |

CVD, cardiovascular disease; LDH, lactate dehydrogenase; EASIX, endothelial activation and stress index.

Figure S1: Cut-point selection for EASIX in the training cohort, maximal selected log rank statistics.

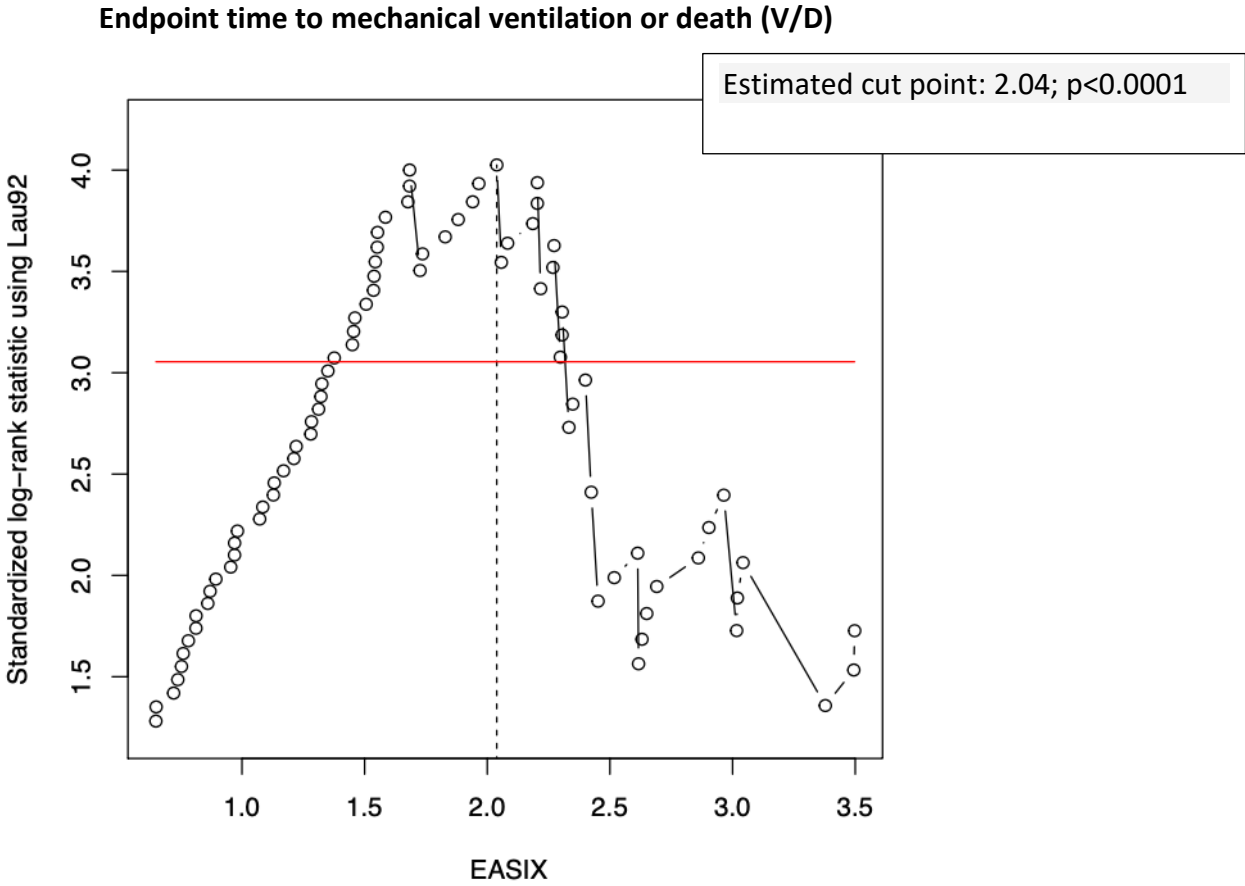

**Figure S2: EASIX and endothelial markers in male and female patients**

V/D, severe clinical course: ventilation and/or death.  
p-values of Kruskal-Wallis tests.

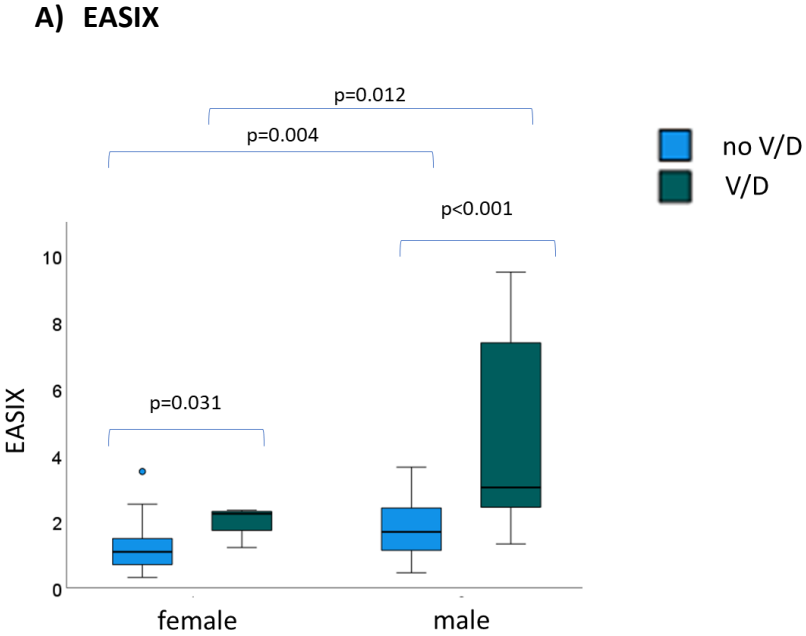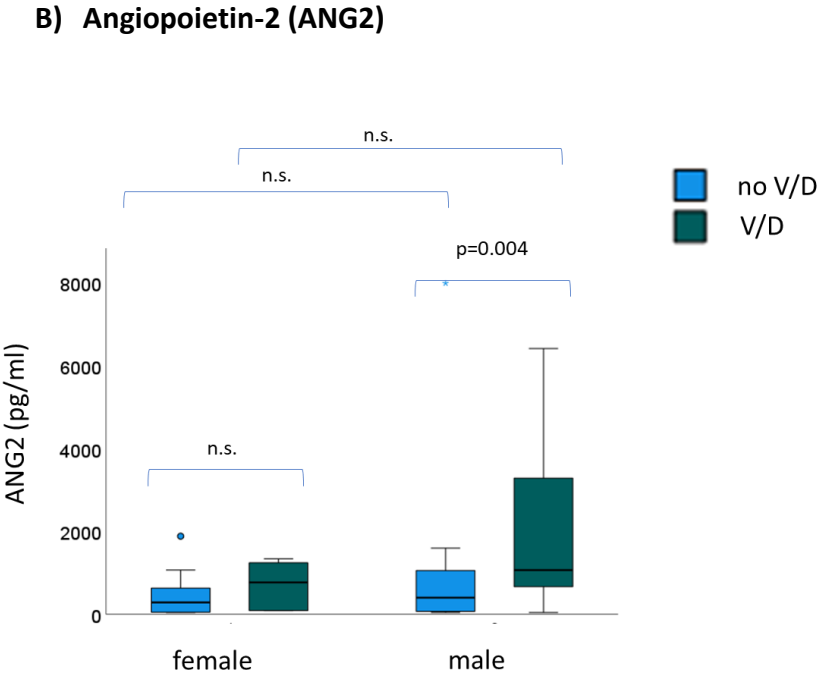

### C) Soluble thrombomodulin (sCD141)

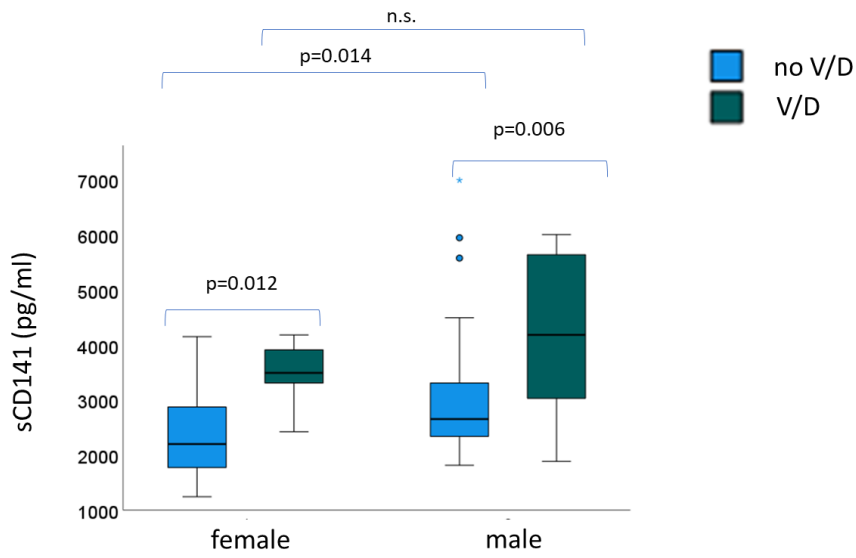

### D) Suppressor of tumorigenicity (ST2)

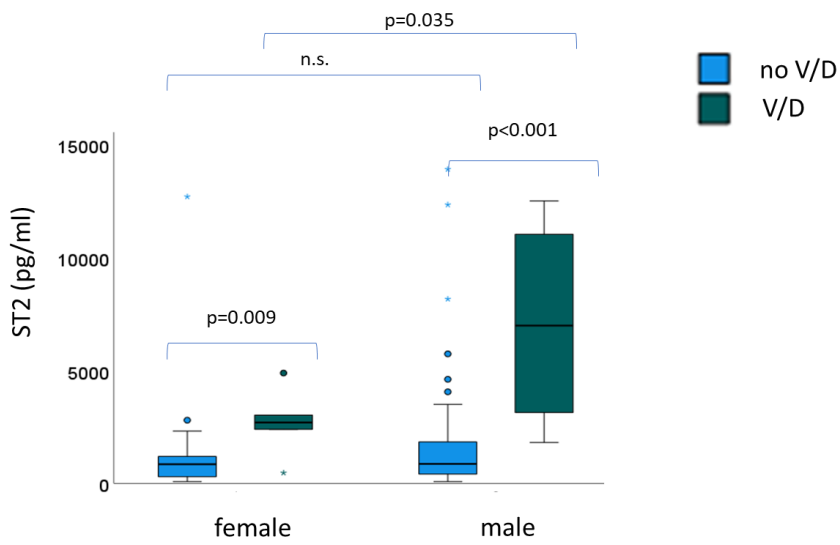

**Figure S3: Validation of the uni- and multivariable logistic regression model of the training cohort using receiver operating characteristics (ROC) for endpoint mechanical ventilation and/or death (V/D) in the validation cohort.**

Both models predict V/D events with high discrimination ability (area under the curve (AUC) above 85%).

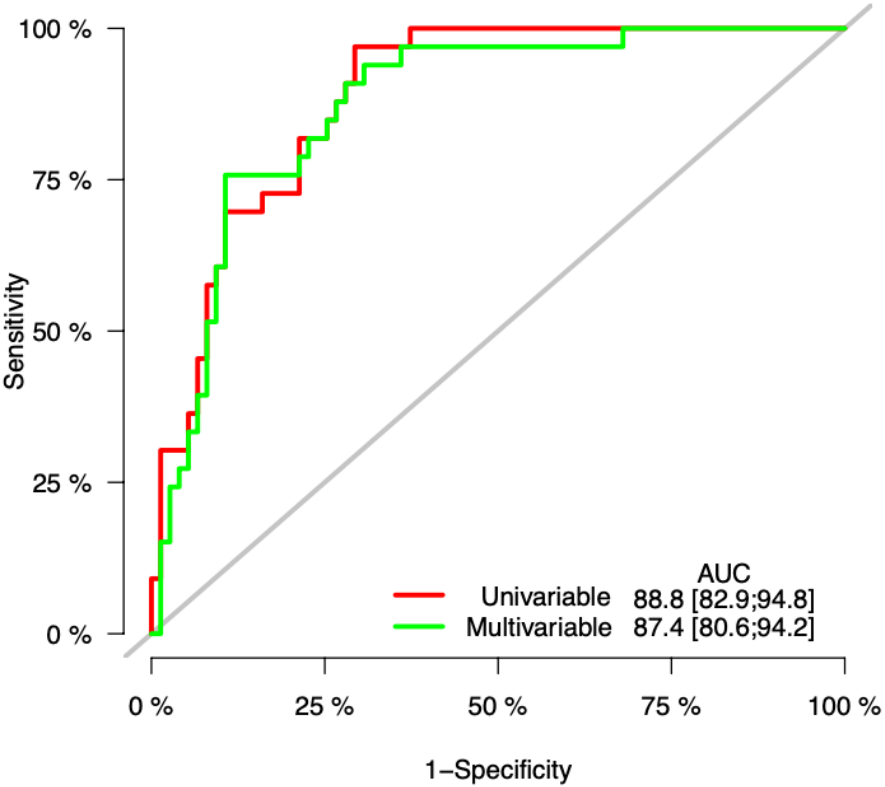

**Figure S4: Validation of the predictive impact of EASIX on outcome of COVID-19**

Prediction errors (time-dependent Brier scores (IBS) for the validation cohort with off-set training cohort) are shown for uni- and multivariable models for endpoints mechanical ventilation and/or death (V/D) and survival. Black lines: reference models (null model). Red lines (univariable) and green lines (multivariable) below the reference indicates model validation.

- A) Endpoint V/D: IBS (time=day+28): reference 0.175, univariable 0.150, multivariable 0.151
- B) Endpoint survival: IBS (time=day+92): reference 0.075, univariable 0.064, multivariable 0.070

A)

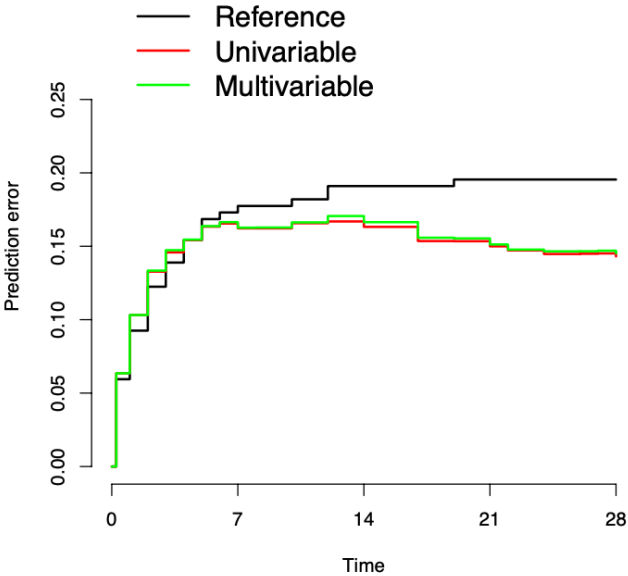

B)

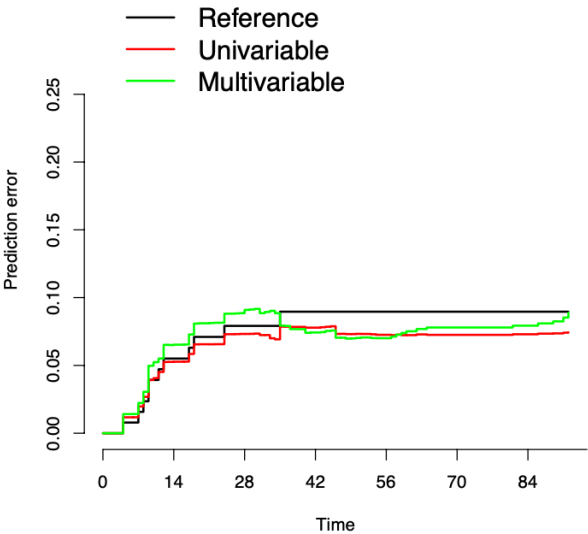

Supplement: DataSheet_1.pdf [file DataSheet_1.pdf]
